# Supplementary material
Source: Springer Nature journal article supplement (https://www.springermedizin.de/resource/supplementary/12943_2014_1419_MOESM6_ESM.pdf/9552940)

Additional file 6: Figure S5

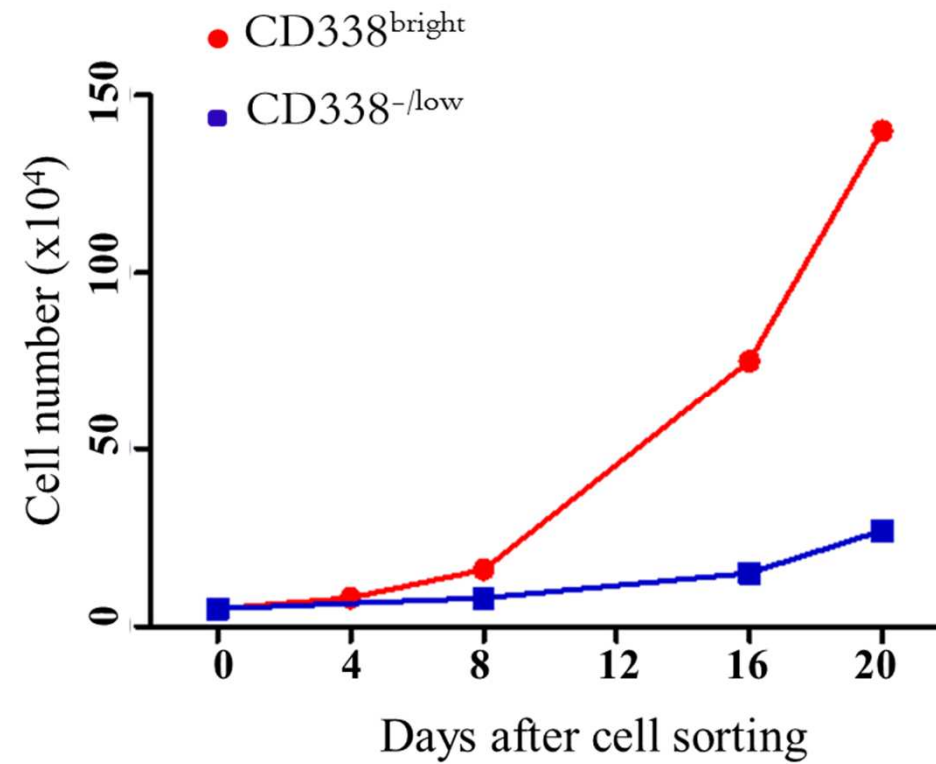

Supplement: MOESM6 [file 9552940]
